# Supplementary material for: The side population enriches for leukemia-propagating cell activity and Wnt pathway expression in zebrafish acute lymphoblastic leukemia
Source: PubMed Central journal article supplement — Haematologica. 2019 Jan 10;104(7):1388–95. doi: 10.3324/haematol.2018.206417 (PMC6601080; doi:10.3324/haematol.2018.206417), 2019-07
Supplement: 2018_206417-Disclosures_and_Contributions.pdf [file 2018_206417-Disclosures_and_Contributions.pdf]

Haematologica  
HAEMATOL/2018/206417  
Version 3

The side population enriches for leukemia propagating cell activity and Wnt pathway expression in zebrafish acute lymphoblastic leukemia.

Jeremy T. Baeten, Michael R. Waarts, Margaret M. Pruitt, Wen-Ching Chan, Jorge Andrade, and Jill L.O. de Jong

Disclosures: University of Chicago Cancer Center P30 CA014599 University of Chicago Women's Board

Contributions: JB, MW, MP, and JdJ developed the experimental plan; JB and MW performed research; MP adapted the side population protocol for zebrafish; JB, WC and JA performed RNAseq data analysis; JB and JdJ wrote the manuscript; JdJ supervised the project. All authors provided comments on the manuscript.
